# Supplementary material for: Establishment of Novel High-Standard Chemiluminescent Assay for NTPase in Two Protozoans and Its High-Throughput Screening
Source: MDPI journal article supplement (doi:10.3390/md18030161), 2020-03-13

Supplementary figure.

Schematic figure indicates procedures and reagents of the novel fluorescent assay using robot arm.

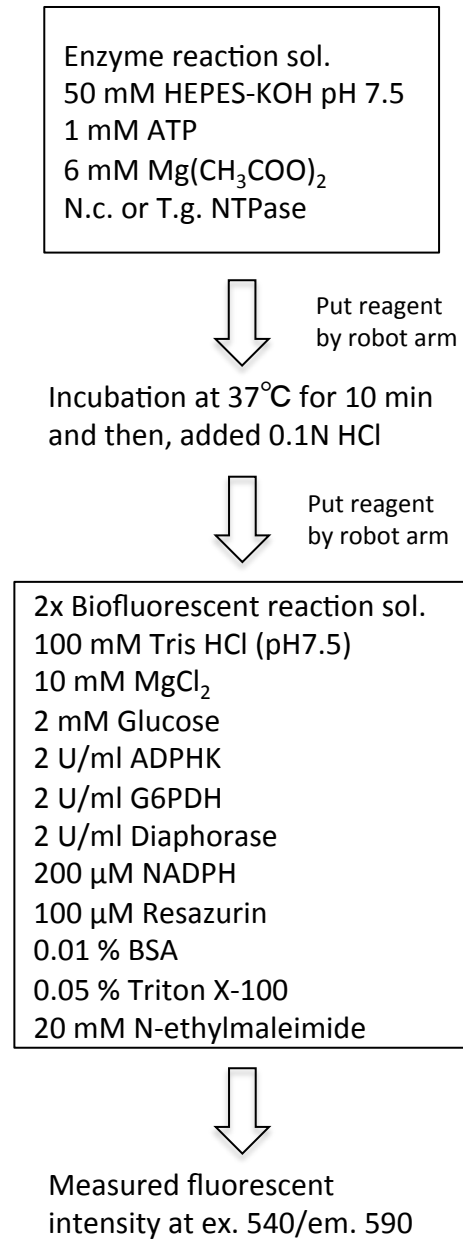

Supplement: s1 [file s1]
